# Supplementary material for: Analysis of the Tomato mTERF Gene Family and Study of the Stress Resistance Function of SLmTERF-13
Source: MDPI journal article supplement (doi:10.3390/plants12152862), 2023-08-03
Supplement: s1 [file s1]

**Table S1.** Subcellular localization of 28 SLmTERF proteins.

| GENE ID          | Prediction   | Other location | Signal peptide | Mitochondrial transfer peptide | Chloroplast transfer peptide | Thylakoid luminal transfer peptide |
|------------------|--------------|----------------|----------------|--------------------------------|------------------------------|------------------------------------|
| <i>SLmTERF1</i>  | Chloroplast  | 0.197675       | 0.000006       | 0.003058                       | 0.75657                      | 0.042691                           |
| <i>SLmTERF2</i>  | Chloroplast  | 0.143444       | 0.001947       | 0.000209                       | 0.801083                     | 0.053318                           |
| <i>SLmTERF3</i>  | Mitochondria | 0.235126       | 0.048539       | 0.390118                       | 0.280796                     | 0.045422                           |
| <i>SLmTERF4</i>  | Other        | 0.514763       | 0.000858       | 0.245457                       | 0.207987                     | 0.030935                           |
| <i>SLmTERF5</i>  | Other        | 0.954047       | 0.005625       | 0.033411                       | 0.002603                     | 0.004314                           |
| <i>SLmTERF6</i>  | Mitochondria | 0.266384       | 0.00003        | 0.731816                       | 0.001021                     | 0.000749                           |
| <i>SLmTERF7</i>  | Mitochondria | 0.187418       | 0.000375       | 0.811325                       | 0.000842                     | 0.00004                            |
| <i>SLmTERF8</i>  | Other        | 0.721259       | 0.034931       | 0.009497                       | 0.225623                     | 0.00869                            |
| <i>SLmTERF9</i>  | Chloroplast  | 0.186059       | 0.046106       | 0.029587                       | 0.733313                     | 0.004935                           |
| <i>SLmTERF10</i> | Mitochondria | 0.103599       | 0.000001       | 0.895282                       | 0.000931                     | 0.000187                           |
| <i>SLmTERF11</i> | Mitochondria | 0.030012       | 0.00009        | 0.957794                       | 0.01121                      | 0.000895                           |
| <i>SLmTERF12</i> | Mitochondria | 0.372148       | 0.00025        | 0.626318                       | 0.000721                     | 0.000564                           |
| <i>SLmTERF13</i> | Other        | 0.798832       | 0.000069       | 0.000081                       | 0.198547                     | 0.002471                           |
| <i>SLmTERF14</i> | Mitochondria | 0.188703       | 0.00082        | 0.733854                       | 0.033438                     | 0.043185                           |
| <i>SLmTERF15</i> | Mitochondria | 0.064389       | 0.008412       | 0.919507                       | 0.006559                     | 0.001133                           |
| <i>SLmTERF16</i> | Mitochondria | 0.019599       | 0.000091       | 0.980087                       | 0.000215                     | 0.000008                           |
| <i>SLmTERF17</i> | Mitochondria | 0.041711       | 0.002902       | 0.951918                       | 0.003386                     | 0.000083                           |
| <i>SLmTERF18</i> | Mitochondria | 0.066356       | 0.014027       | 0.917848                       | 0.00175                      | 0.00002                            |
| <i>SLmTERF19</i> | Other        | 0.974325       | 0.000052       | 0.018681                       | 0.004573                     | 0.002368                           |
| <i>SLmTERF20</i> | Other        | 0.997495       | 0.001683       | 0.000618                       | 0.000133                     | 0.00007                            |
| <i>SLmTERF21</i> | Other        | 0.95512        | 0.044245       | 0.000609                       | 0.000023                     | 0.000003                           |
| <i>SLmTERF22</i> | Other        | 0.418844       | 0.006053       | 0.3503                         | 0.223404                     | 0.001399                           |
| <i>SLmTERF23</i> | Other        | 0.996778       | 0.000624       | 0.002543                       | 0.000047                     | 0.000008                           |
| <i>SLmTERF24</i> | Other        | 0.975382       | 0.010421       | 0.001377                       | 0.000008                     | 0.012812                           |
| <i>SLmTERF25</i> | Chloroplast  | 0.045233       | 0.000248       | 0.000945                       | 0.945229                     | 0.008345                           |
| <i>SLmTERF26</i> | Other        | 0.996669       | 0.00041        | 0.002142                       | 0.000466                     | 0.000313                           |
| <i>SLmTERF27</i> | Other        | 0.999938       | 0.000057       | 0.000002                       | 0.000002                     | 0.000001                           |
| <i>SLmTERF28</i> | Other        | 0.998608       | 0.000506       | 0.000878                       | 0.000007                     | 0.000001                           |

**Table S2.** Primers for fluorescent quantitative PCR of tomato mTERF gene family and *SLmTERF13* gene silencing.

| Primer name | Sequence (5'-3')           | Primer name | Sequence (5'-3')           |
|-------------|----------------------------|-------------|----------------------------|
| SLmTERF1-F  | CTAGGTTTGGCCAGCC<br>GTTA   | SLmTERF1-R  | CTTCAGGCGTTGTCTGA<br>TCCT  |
| SLmTERF2-F  | ACCATCGTCATCAGCA<br>TCATGT | SLmTERF2-R  | GTGTAAAGACGCGGT<br>GTGAAG  |
| SLmTERF4-F  | AGAACCTGGATGCCGA<br>ACTT   | SLmTERF4-R  | GGGAAAAAGGAACA<br>CGTACAC  |
| SLmTERF5-F  | AACGCTACTTCCCAAC<br>CCAA   | SLmTERF5-R  | TGTAAAATCGCTTGG<br>GGCCT   |
| SLmTERF6-F  | TGGTTTCGGAGTTGCCT<br>GAT   | SLmTERF6-R  | AATTGGCACGACACC<br>AGAGT   |
| SLmTERF8-F  | TACTGCTCAAATGCAA<br>CGCC   | SLmTERF8-R  | ATAGCATCACCCCGG<br>AATCG   |
| SLmTERF10-F | AACATGTTCCATCGAC<br>CCCG   | SLmTERF10-R | CTCTCGTAGCAAAGC<br>AGCAC   |
| SLmTERF11-F | GATCTCCATCCAACCTG<br>CGCT  | SLmTERF11-R | CGACCGGATATGGTA<br>AGGGC   |
| SLmTERF13-F | GGGTGAACGAAATGCT<br>CGTC   | SLmTERF13-R | TGTTCCGAGTTGAGGT<br>TGAGT  |
| SLmTERF14-F | TCTCACCGTGAAAATC<br>TCCGT  | SLmTERF14-R | AGCCTGGGAGAAGCC<br>TTTAG   |
| SLmTERF17-F | GCAGCTGTGCCTTACC<br>TTCT   | SLmTERF17-R | GTGTGAACGGACGCA<br>TTTGT   |
| SLmTERF18-F | CCTTGAAGGTGTTGCC<br>CAGT   | SLmTERF18-R | TCTCTGTGAAATCGGT<br>CGGC   |
| SLmTERF19-F | GCGGAGTTCCTGGCAT<br>CCTA   | SLmTERF19-R | CATCCCTGAAGTGAG<br>AGGCA   |
| SLmTERF20-F | TGCTGCTATTGGTTTTG<br>CCG   | SLmTERF20-R | CAGCCGAGAGACAAG<br>GTGTT   |
| SLmTERF21-F | CACTGCACCATTTACT<br>GTCGC  | SLmTERF21-R | TGTTCTCTAGTTTTGC<br>CCTGAA |
| SLmTERF22-F | AGCTGCTGTCTTGCCTT<br>CTC   | SLmTERF22-R | TGTCATCGTCGCTACA<br>ACCC   |
| SLmTERF23-F | AGTTTTGCCCCGGTTG<br>GAAT   | SLmTERF23-R | CATCAGGCAGCTTAT<br>GGGCA   |
| SLmTERF27-F | AGAGGCAGCTTATCCG<br>TTCG   | SLmTERF27-R | GCCAGAACTGTGGCT<br>GTTTG   |
| SLmTERF28-F | GACAAAAGCGAATCC<br>AGCCC   | SLmTERF28-R | GCAGAACGAATCTGC<br>TGTC    |
| Actin-7-F   | ATTGGTGCTGAGAGGT<br>TCCG   | Actin-7-R   | CGGGAAACAGACAG<br>GACACT   |

|                  |                   |                  |                 |
|------------------|-------------------|------------------|-----------------|
| SLmTERF13-F      | GTGAGTAAGGTTACCG  | SLmTERF13-R      | CGTGAGCTCGGTACC |
| (gene silencing) | AATTCTTTCCTTATGGA | (gene silencing) | GGATCCCTCAAGCTT |
|                  | TTTCATACGTTA      |                  | CTTTT CGTCCAA   |

**Table S3.** YFP-*SLmTERF13* gene PCR primers.

| Primer name              | Sequence                                       | Primer length | Product length |
|--------------------------|------------------------------------------------|---------------|----------------|
| YFP- <i>SLmTERF13</i> -F | ACGGGGGACTCTAGAGGATCCATGCTCG<br>TCA GATTCAGAGG | 20            | 1107           |
| YFP- <i>SLmTERF13</i> -R | GCCCTTGCTCACCATGGTACCAGGAGCC<br>AGA GTTTTCTGG  | 19            |                |

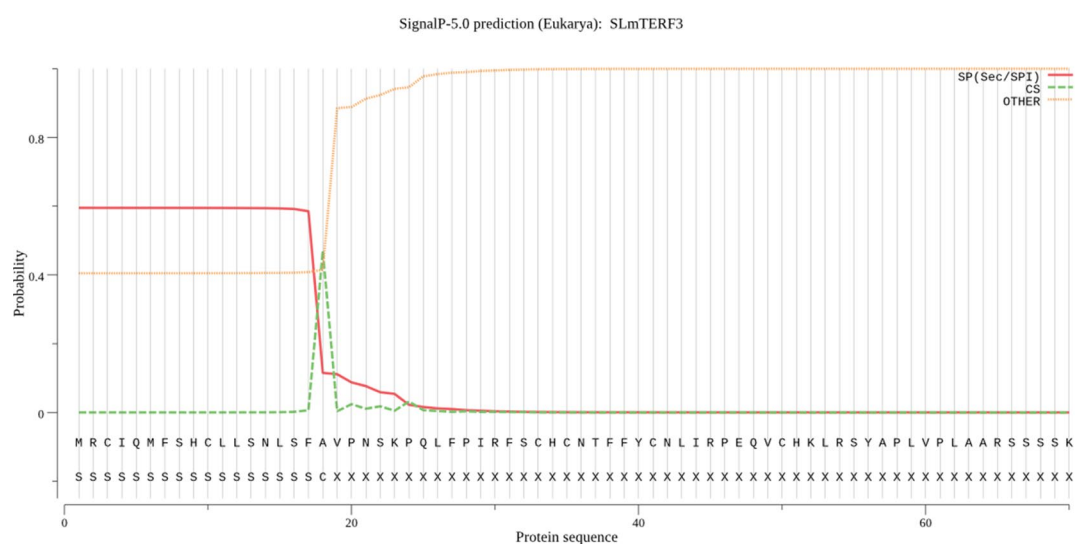

**Figure S1.** Prediction of the *SLmTERF3* signal peptide.
